# Supplementary material for: Selection, characterization, and biosensing applications of DNA aptamers targeting cyanotoxin BMAA
Source: Royal Society of Chemistry journal article supplement (doi:10.1039/d4ra02384f), 2024-01-01
Supplement: d4ra02384f1.pdf [file d4ra02384f1.pdf]

## Supplementary Information

### **Selection, Characterization, and Biosensing Applications of DNA Aptamers Targeting Cyanotoxin BMAA**

Xaimara Santiago-Maldonado<sup>1</sup>, José A. Rodríguez-Martínez<sup>2</sup>, Luis López<sup>1</sup>, Lisandro Cunci<sup>1</sup>, Marvin Bayro<sup>1,3</sup>, Eduardo Nicolau<sup>1,3\*</sup>

<sup>1</sup>Department of Chemistry, University of Puerto Rico, San Juan, PR 00925-2437, United States

<sup>2</sup>Department of Biology, University of Puerto Rico, San Juan, PR 00925-2437, United States

<sup>3</sup>Molecular Science Research Center, University of Puerto Rico, San Juan, 00931-3346, United States

Corresponding Author\*

Phone: 787-292-9820, fax: 787-522-2150; email: [eduardo.nicolau@upr.edu](mailto:eduardo.nicolau@upr.edu)

## Table of Contents

Figure S1. Chemical structure BMAA

Figure S2. Chemical structure of the counter-targets

Table S1. DNA oligos used for SELEX

Table S2. Sequences of the DNA aptamers

Table S3. Beads-SELEX scheme for selection of BMAA-specific aptamers

Table S4. Identification of overrepresented motifs using AptaTRACE

Table S5. Apparent  $K_d$  values of the initial screening

Figure S3. Screening for binders using the SG fluorescence displacement assay.

Figure S4. Secondary structure of the aptamers with the highest affinity

Figure S5. Non-specific binding BMAA-conjugated fluorescence assay

Figure S6. Amino proton region of  $^1\text{H}$  NMR spectra

Figure S7. Replicates SG fluorescence displacement assay

Table S6. Results of the non-linear fit SG fluorescence displacement assay

Figure S8. Replicates BMAA-conjugated fluorescence assay

Table S7. Results of the non-linear fit BMAA-conjugated fluorescence assay

Figure S9. Independent experiments for the electrochemical detection of BMAA

Figure S10. Calibration curves of the EAB sensor

Table S8. Determination of LOD and LOQ values for the EAB sensor

Figure S11. Electrochemical detection of AEG, atenolol, and DAB

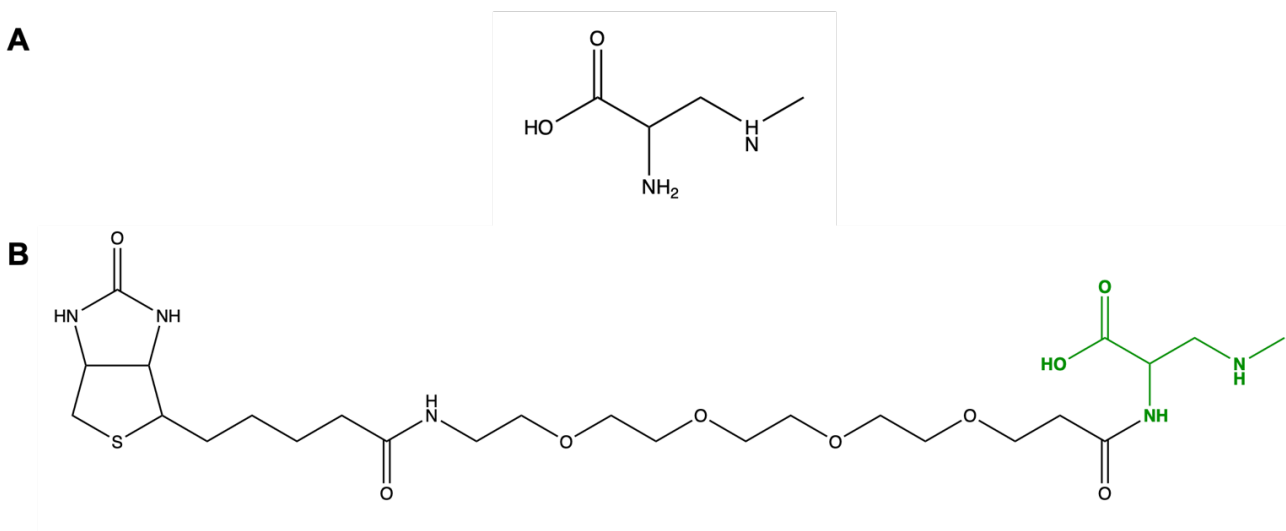

**Figure S1.** Chemical structures A) BMAA B) Biotinylated BMAA consisting of a biotin moiety with a PEG<sub>4</sub> spacer arm covalently attached to the primary amine of BMAA (shown in green).

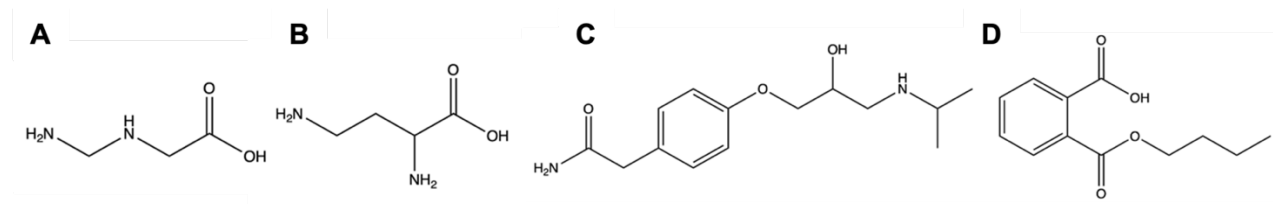

**Figure S2.** Chemical structures of counter targets, including isomers A) aminoethylglycine (AEG) B) 2,4-diaminobutyric acid (DAB) and other low molecular-weight emerging contaminants C) Atenolol D) Mono-butyl phthalate.

**Table S1.** DNA oligos used for SELEX

| <b>Name</b>                                   | <b>Sequence (5' - 3')</b>                                                           |
|-----------------------------------------------|-------------------------------------------------------------------------------------|
| Library                                       | TGTACCGTCTGAGCGATTCGTAC (N <sub>34</sub> ) AGCCAGTCA<br>GTGTTAAGGAGTGC              |
| Forward primer                                | TGTACCGTCTGAGCGATTCGTAC                                                             |
| Forward primer + biotin                       | /Biot/ GCA CTC CTT AAC ACT GAC TGG CT                                               |
| Reverse primer                                | GCACTCCTTAACACTGACTGGCT                                                             |
| xGen full-length UDI-<br>UMI adapter index i7 | GATCGGAAGAGCACACGTCTGAACTCCAGTCAC [i7] <sub>8</sub> UMI<br>ATCTCGTATGCCGTCTTCTGCTTG |
| xGen full-length UDI-<br>UMI adapter index i5 | AATGATACGGCGACCACCGAGATCTACAC [i5] <sub>8</sub><br>ACACTCTTCCCTACACGACGCTCTTCCGATCT |

**Table S2.** Sequences of the DNA aptamers. Overrepresented motifs are underlined.

| <b>Full-length</b> | <b>N<sub>34</sub> Sequence (5' - 3')</b>                         |
|--------------------|------------------------------------------------------------------|
| BMAA_159           | GGCTCGGCCCTGGGT <u>GAGGGG</u> CGCAGTGGGGTGT                      |
| BMAA_165           | GGGCGTGTGT <u>GGGAGGGG</u> GCACTTCGTCTCGGGGTG                    |
| BMAA_172           | <u>GGGGG</u> CCAGTGAATGAGTT <u>GGGGT</u> GGTAATGGGG              |
| BMAA_96            | AGAG <u>GGGGT</u> GGCGGGTGTCTGGAGT <u>GGAGGGT</u> GG             |
| BMAA_38            | <u>GGGGG</u> TTCACGCTC <u>GAGGGG</u> GCCACAG <u>GGGGG</u> AGT    |
| BMAA_165_scrambled | AGTCGTTGGGGGGGGGGGTGAGCGTTGCGCGCGTAGC<br>C                       |
| <b>Truncated</b>   | <b>Sequence (5' - 3')</b>                                        |
| BMAA_159_min       | GGCTCGGCCCTGGGT <u>GAGGGG</u> CGCAGT <u>GGGGT</u> GTAGC<br>CAG   |
| BMAA_165_min       | GGGCGTGTGT <u>GGGAGGGG</u> GCACTTCGTCT <u>CGGGG</u> TGAGC<br>CAG |
| <b>Biosensing</b>  |                                                                  |
|                    | /5ThioMC6-                                                       |
| BMAA_165_min       | D/GGGCGTGTGTGGGAGGGGGCACTTCGTCTCGGGGTG/3A<br>mMO/-3'             |

**Table S3.** Beads-SELEX scheme for selection of BMAA-specific aptamers (IT = immobilization target, IS = immobilization substrate, CE = competitive elution, CTs = counter targets, IM = isomers).

| Round | Positive Selection       | Time            | Round | Negative Selection          | Time                |
|-------|--------------------------|-----------------|-------|-----------------------------|---------------------|
| 1     | IT                       | 48 h            |       | -                           | -                   |
| 2     | IT                       | 24 h            |       | -                           | -                   |
| 3     | IT                       | 18 h            | 4     | IS                          | 1 h                 |
| 5     | IT                       | 12 h            | 6     | IS                          | 3 h                 |
| 7     | IT                       | 6 h             | 8     | IS                          | 6 h                 |
| 9     | IT / CE 500 $\mu$ M BMAA | 3 h / 1 h       | 10    | IT / 1 $\mu$ M CTs          | 3 h / 1.5 h / 1.5 h |
| 11    | IT / CE 500 $\mu$ M BMAA | 1 h / 30 min    | 12    | IT / 1 $\mu$ M IM AEG       | 3 h / 3 h           |
| 13    | IT / CE 100 $\mu$ M BMAA | 30 min / 15 min | 14    | IT / 1 $\mu$ M IM L-DAB     | 3 h / 3 h           |
| 15    | IT / CE 10 $\mu$ M BMAA  | 15 min / 5 min  | 16    | IT / 1 $\mu$ M IMs (serial) | 1 h / 1 h / 1 h     |
| 17    | IT / CE 1 $\mu$ M BMAA   | 5 min / 2 min   |       | -                           | -                   |
| 18    | IT / CE 100 nM BMAA      | 1 min / 1 min   |       | -                           | -                   |

**Table S4.** Identification of overrepresented motifs using AptaTRACE

| <b>Selection Method</b> | <b>Motif Profile</b> | <b>Seed</b> | <b>Seed P-value</b> | <b>Seed frequency</b> | <b>Motif frequency</b> |
|-------------------------|----------------------|-------------|---------------------|-----------------------|------------------------|
| <b>Beads-SELEX</b>      | GGGGG                | TGGGGG      | 0.050               | 3.93%                 | 8.29%                  |
|                         | GGGAG                | GGGGAG      | 0.045               | 2.87%                 | 4.44%                  |
|                         | GAGGGG               | GAGGGG      | 0.031               | 2.69%                 | 2.69%                  |
|                         | GGAGGG               | GGAGGG      | 0.029               | 2.54%                 | 2.54%                  |

**Table S5.** Apparent  $K_d$  values of the initial screening were obtained using the SG fluorescence displacement assay. The  $K_d$  values were determined through non-linear regression analysis by fitting the data with one site-specific binding equation using GraphPad Prism 10.2.0. No binding refers to the absence of a concentration-dependent trend within the studied range of concentrations.

| <b>ID</b> | <b><math>K_d</math> (95% CI)</b> | <b><math>K_d</math> (<math>\mu</math>M)</b> |
|-----------|----------------------------------|---------------------------------------------|
| BMAA_159  | 1.02 – 8.66                      | 3.03                                        |
| BMAA_165  | 0.149 – 0.690                    | 0.234                                       |
| BMAA_172  | 5.23 – 9.56                      | 6.50                                        |
| BMAA_96   | No binding*                      | -                                           |
| BMAA_38   | 3.08 - 102                       | 18.6                                        |

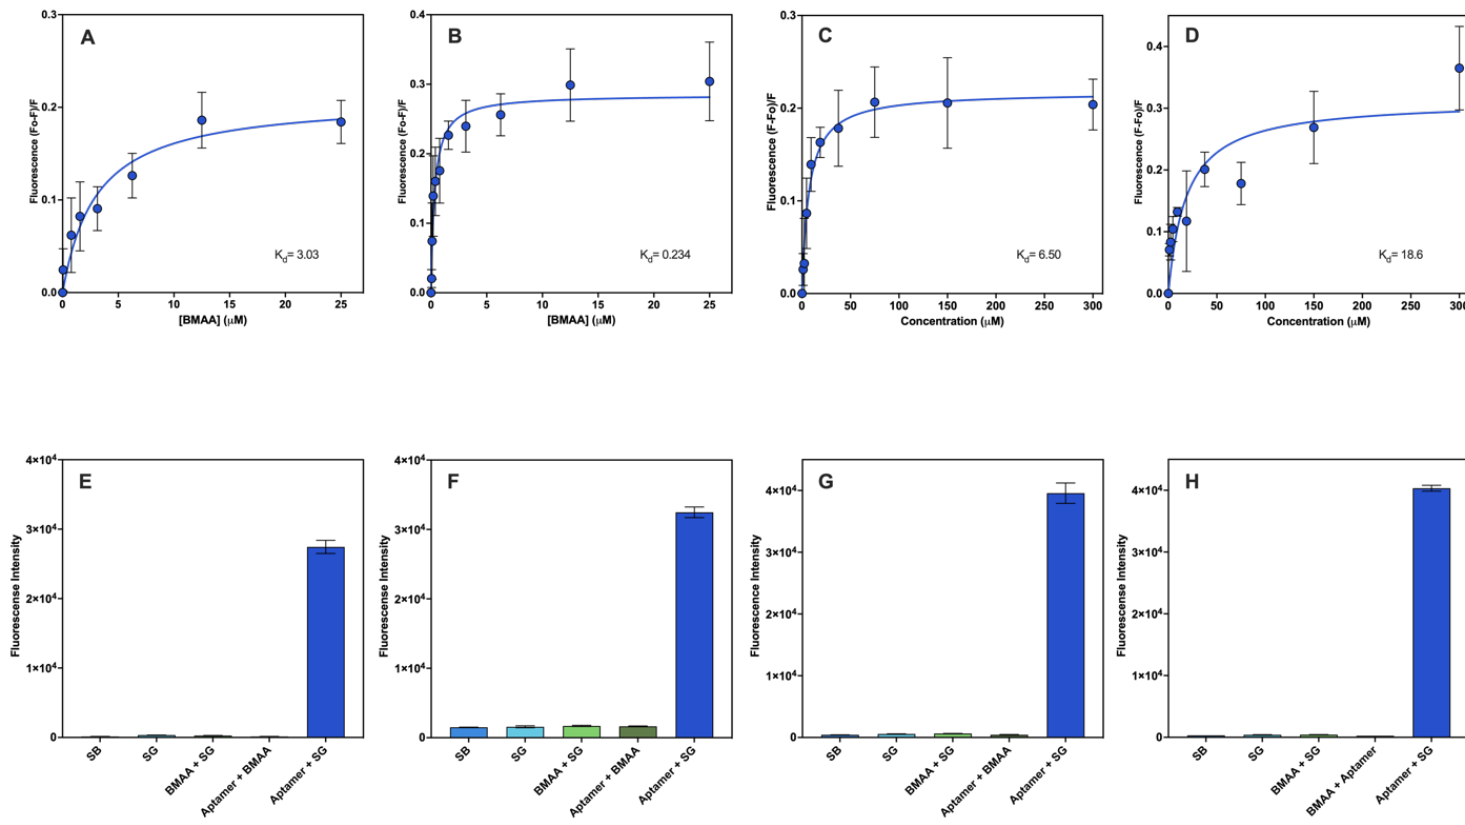

**Figure S3.** Screening for binders using the SG fluorescence displacement assay. Binding isotherms of A) BMAA\_159 ( $K_d = 3.03$ ) B) BMAA\_165 ( $K_d = 0.234$ ) C) BMAA\_172 ( $K_d = 6.50$ ) D) BMAA\_38 ( $K_d = 18.6$ ). BMAA\_96 did not show a concentration-dependent trend within the studied range of concentrations. The  $K_d$  values were determined through non-linear regression analysis by fitting the data with one site-specific binding equation using GraphPad Prism 10.2.0. Control samples of E) BMAA\_159 F) BMAA\_165 G) BMAA\_172 H) BMAA\_38. Measurements were performed in triplicates and the error bars represent the calculated standard error.





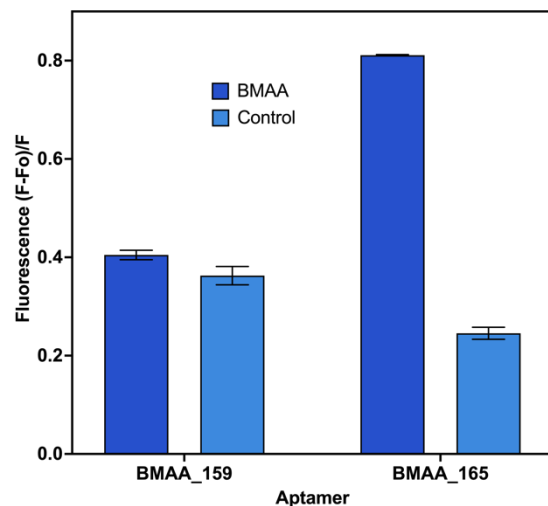

**Figure S5.** Non-specific binding of truncated aptamers measured with the BMAA-conjugated fluorescence assay. Normalized fluorescence response of the aptamers (1  $\mu\text{M}$ ) with BMAA and without (control). Measurements were performed in triplicates and the error bars represent the calculated standard error.

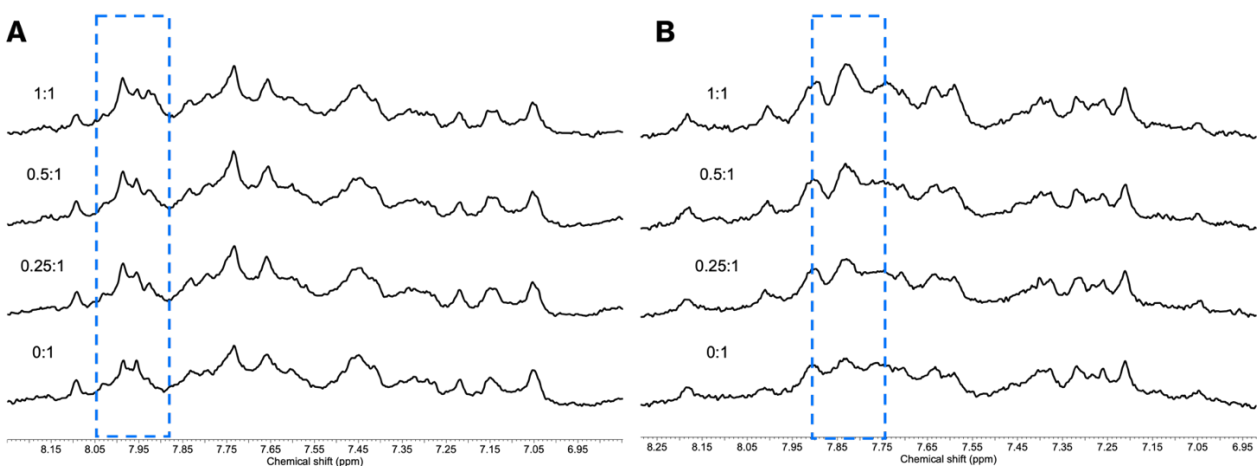

**Figure S6.** Amino proton region of the  $^1\text{H}$  NMR spectra recorded in 20 mM sodium phosphate buffer with 100 mM NaCl and 2 mM  $\text{MgCl}_2$  at 700 MHz  $^1\text{H}$  frequency of A) BMAA\_159\_min B) BMAA\_165\_min. Aptamer solutions (20  $\mu\text{M}$ ) were incubated with increasing molar concentrations of BMAA. Chemical shift perturbations are highlighted, indicating a conformational change in the aptamer upon binding.

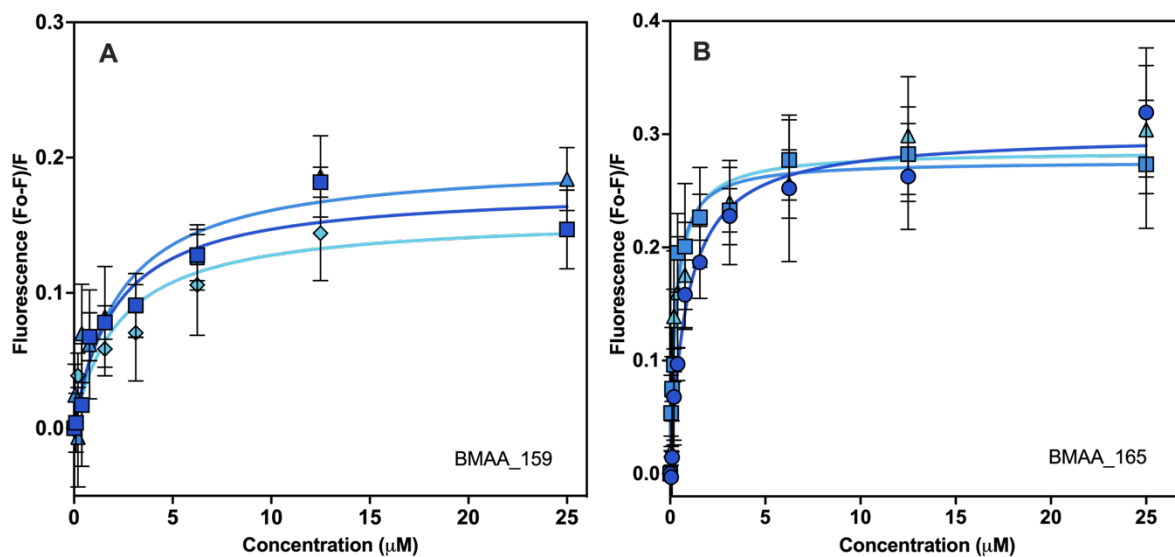

**Figure S7.** Independent experiments SG fluorescence displacement assay. Binding isotherms were obtained using GraphPad Prism 10.2.0 for A) BMAA\_159 and B) BMAA\_165. Measurements were performed in triplicates and the error bars represent the calculated standard error.

**Table S6.** Apparent  $K_d$  values were obtained using the SG fluorescence displacement assay. Each measurement represents an independent experiment. The  $K_d$  values were determined through non-linear regression analysis by fitting the data with one site-specific binding equation using GraphPad Prism 10.2.0.

| Aptamer  | $K_d$ (95% CI) | $K_d$ ( $\mu\text{M}$ ) | $R^2$ | $K_d$ ( $\mu\text{M}$ ) | Standard Error |
|----------|----------------|-------------------------|-------|-------------------------|----------------|
|          |                | Best fit                |       | Mean                    |                |
| BMAA_159 | 0.93 - 4.38    | 2.06                    | 0.94  | 2.2                     | 0.1            |
|          | 0.78 - 6.50    | 2.30                    | 0.90  |                         |                |
|          | 0.84 - 5.91    | 2.27                    | 0.92  |                         |                |
| BMAA_165 | 0.60 - 1.24    | 0.86                    | 0.98  | 0.32                    | 0.02           |
|          | 0.18 - 0.37    | 0.26                    | 0.98  |                         |                |
|          | 0.20 - 0.51    | 0.32                    | 0.97  |                         |                |

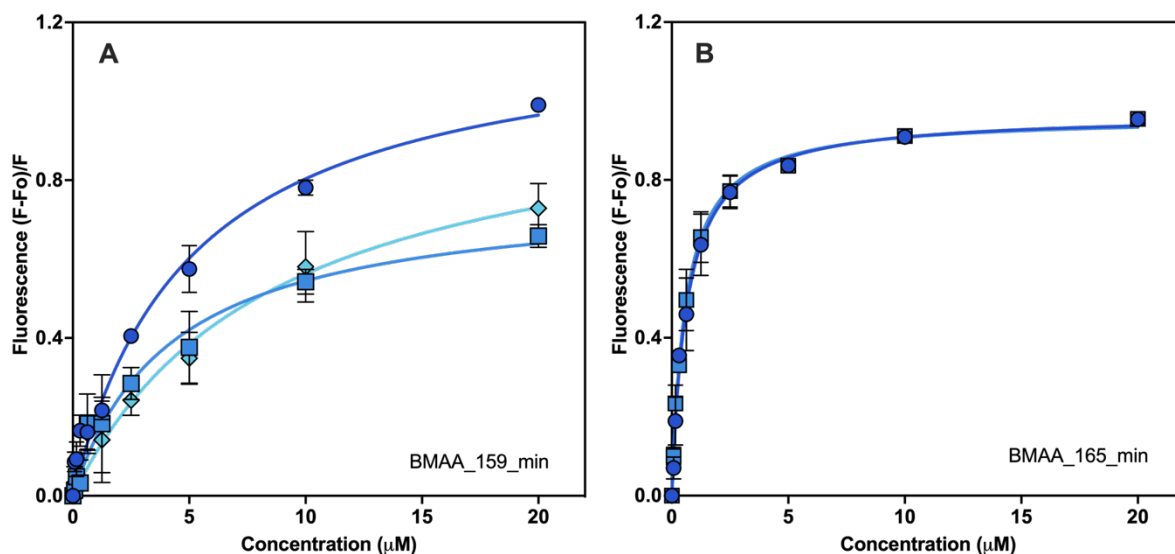

**Figure S8.** Independent experiments BMAA-conjugated fluorescence assay. Binding isotherms were obtained using GraphPad Prism 10.2.0 for A) BMAA\_159 B) BMAA\_165. Measurements were performed in triplicates and the error bars represent the calculated standard error.

**Table S7.** Apparent  $K_d$  values were obtained using the BMAA-conjugated fluorescence assay. Each measurement represents an independent experiment. The  $K_d$  values were determined through non-linear regression analysis by fitting the data with one site-specific binding equation using GraphPad Prism 10.2.0.

| Aptamer      | $K_d$ (95% CI) | $K_d$ ( $\mu$ M) | $R^2$ | $K_d$ ( $\mu$ M) | Standard Error |
|--------------|----------------|------------------|-------|------------------|----------------|
|              |                | Best fit         |       | Mean             |                |
| BMAA_159_min | 3.12 – 8.26    | 5.02             | 0.98  | 6                | 1              |
|              | 2.55 – 7.03    | 4.20             | 0.98  |                  |                |
|              | 4.53 – 17.72   | 8.54             | 0.97  |                  |                |
| BMAA_165_min | 0.56 – 0.75    | 0.65             | 0.99  | 0.63             | 0.02           |
|              | 0.52 – 0.66    | 0.58             | 0.99  |                  |                |
|              | 0.55 – 0.76    | 0.65             | 0.99  |                  |                |

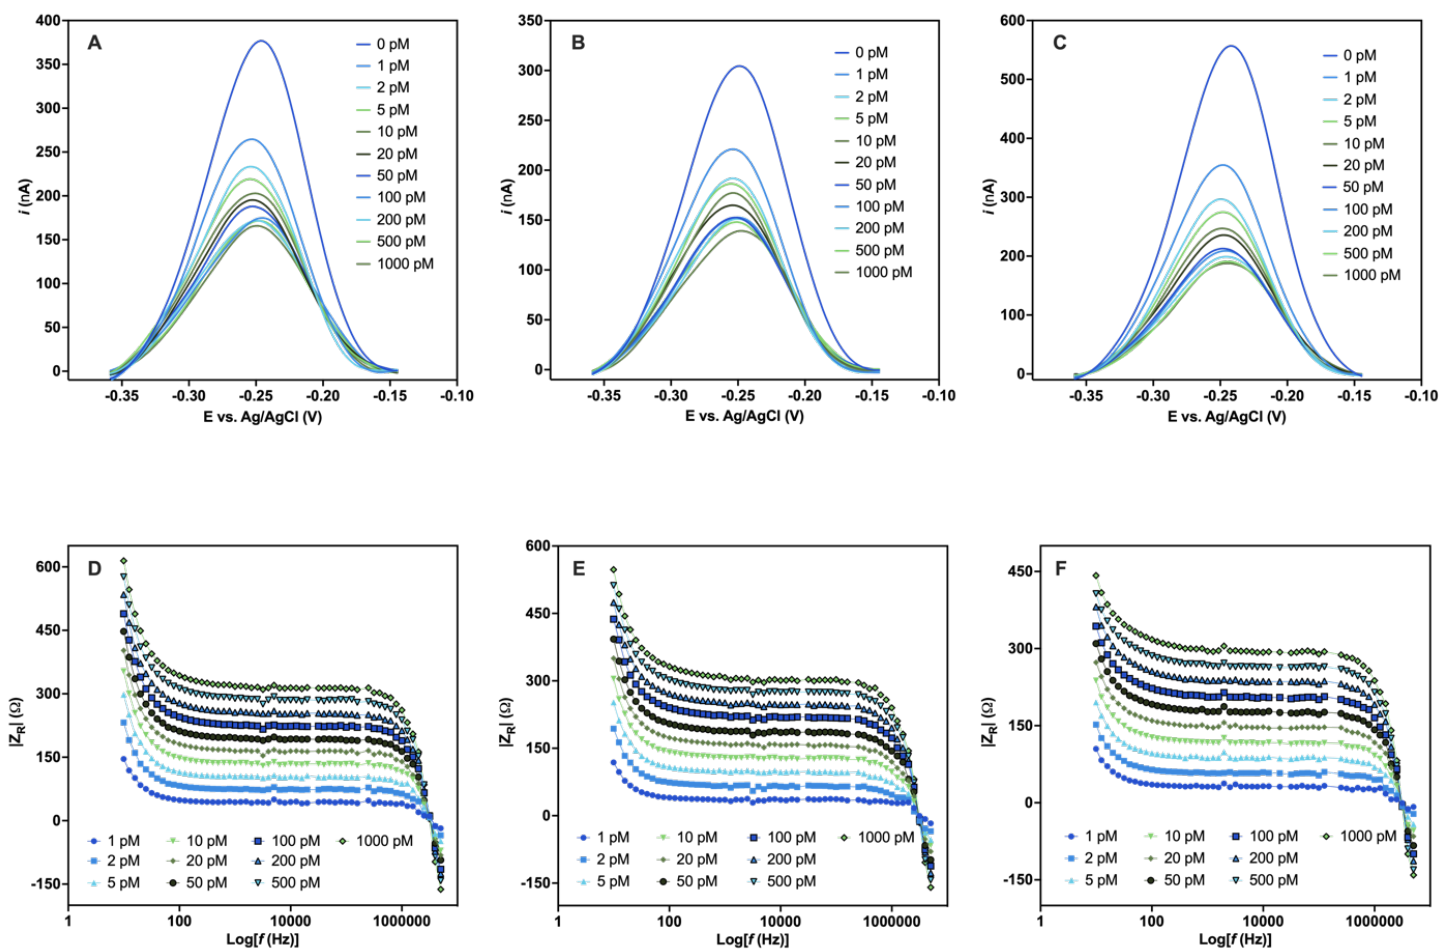

**Figure S9.** Independent experiments for the electrochemical detection of the EAB sensor upon addition of varying concentrations of BMAA (0, 1, 2, 5, 10, 20, 50, 100, 200, 500, 1000 pM) performed in buffer solution (4 mM NaCl, 0.2 mM MgCl<sub>2</sub>, and 0.8 mM Tris at pH 7.4). Changes in current measured using SWV A) Electrode 1 B) Electrode 2 C) Electrode 3. Analytical response using the absolute value of  $Z_R$  ( $\Omega$ ) obtained using EIS D) Electrode 1 E) Electrode 2 F) Electrode 3. Measurements were performed in triplicates.

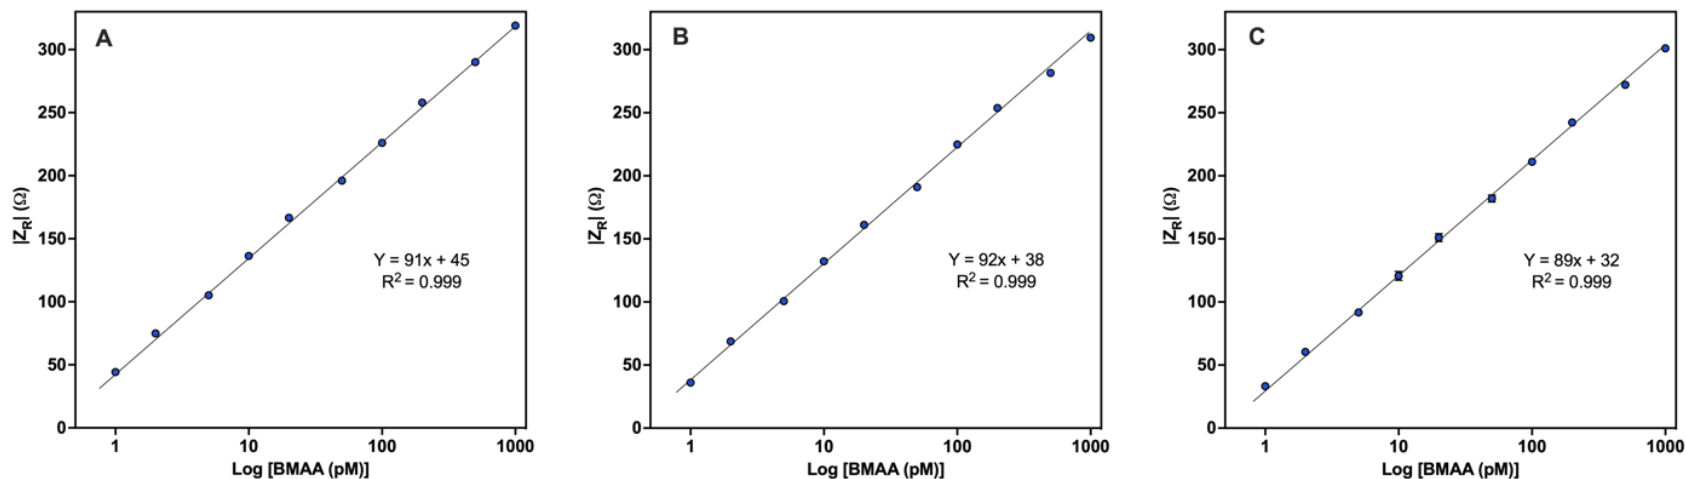

**Figure S10.** Independent experiments of the EAB sensor. Calibration curves of the analytical response  $|Z_R|$  ( $\Omega$ ) against BMAA concentration A) Electrode 1 ( $Y = 91x + 45$ ,  $R = 0.999$ ,  $n=3$ ) B) Electrode 2 ( $Y = 92x + 38$ ,  $R = 0.999$ ,  $n=3$ ) C) Electrode 3 ( $Y = 89x + 32$ ,  $R = 0.999$ ,  $n=3$ ). Simple linear regression analysis was obtained using GraphPad Prism 10.2.0.

**Table S8.** Determination of LOD and LOQ values for the EAB sensor. Simple linear regression analysis was obtained using GraphPad Prism 10.2.0.  $LOD = 3\sigma/S$  and  $LOQ = 10\sigma/S$ , where  $S$  is the slope of the curve and  $\sigma$  is the standard deviation. SE represents the calculated standard error.

| Electrode | S  | $\sigma$ | LOD (pM) | Mean     | SE   | LOQ (pM) | Mean     | SE   |
|-----------|----|----------|----------|----------|------|----------|----------|------|
|           |    |          |          | LOD (pM) |      | LOQ (pM) | LOQ (pM) |      |
| 1         | 91 | 1        | 1.11     |          |      | 1.38     |          |      |
| 2         | 92 | 2        | 1.17     | 1.13     | 0.03 | 1.62     | 1.46     | 0.07 |
| 3         | 89 | 1        | 1.11     |          |      | 1.38     |          |      |

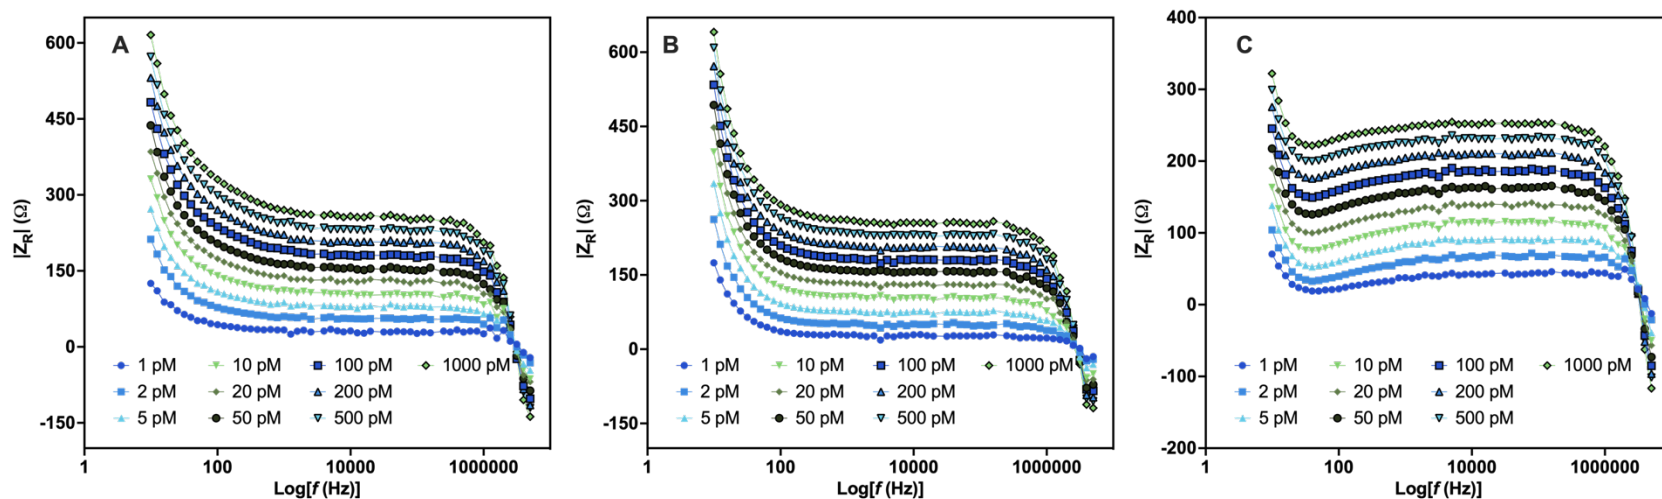

**Figure S11.** Electrochemical detection of the EAB sensor upon addition of varying concentrations of analyte (0, 1, 2, 5, 10, 20, 50, 100, 200, 500, 1000 pM) performed in buffer solution (4 mM NaCl, 0.2 mM MgCl<sub>2</sub>, and 0.8 mM Tris at pH 7.4). Analytical response using the absolute value of  $Z_R$  ( $\Omega$ ) obtained using EIS of analyte A) AEG B) Atenolol 2 C) DAB. Measurements were performed in triplicates.
